# Supplementary material for: Randomized Controlled Trial of Advance Notification Phone Calls vs Text Messages Prior to Mailed Fecal Test Outreach
Source: PubMed Central journal article supplement — Clin Gastroenterol Hepatol. Author manuscript; Available in PMC 2022 Jul 15. (PMC9285860; doi:10.1016/j.cgh.2020.07.053), 2020-07-30
Supplement: NIHMS1617917-supplement-1.pdf [file NIHMS1617917-supplement-1.pdf]

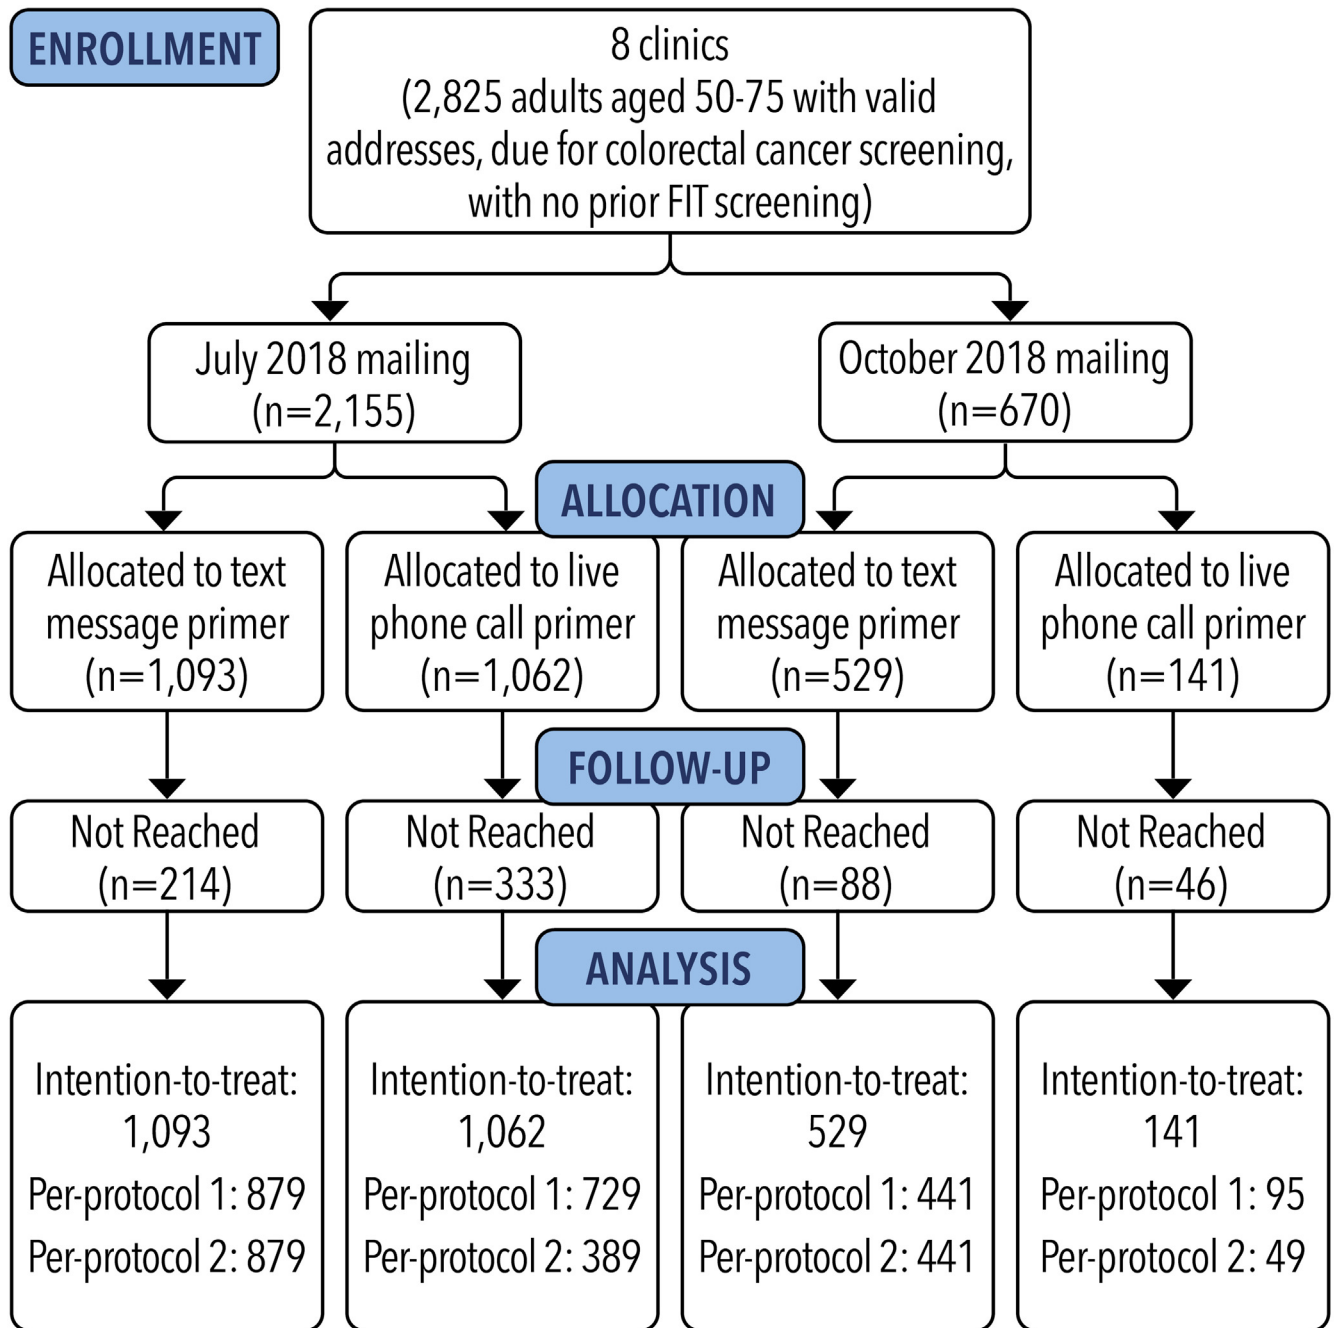

Supplementary Figure 1. PROMPT study CONSORT diagram. FIT, fetal immunochemical test.

**Supplementary Table 1.** Differences in the effects of text and live call primers across sociodemographic and health care utilization factors

| Characteristic             | Randomization condition               |                      |                                                                     |                      |                         |                                  |
|----------------------------|---------------------------------------|----------------------|---------------------------------------------------------------------|----------------------|-------------------------|----------------------------------|
|                            | Text message primer (reached by text) |                      | Live phone call primer (reached by live call – had live discussion) |                      | Effect                  |                                  |
|                            | Completed FIT within 3 months         |                      | Completed FIT within 3 months                                       |                      | Main Effect OR (95% CI) | Interaction <sup>a</sup> P value |
|                            | N (Denominator)                       | N (% FIT Completion) | N (Denominator)                                                     | N (% FIT Completion) |                         |                                  |
| Age                        |                                       |                      |                                                                     |                      |                         |                                  |
| 50-64                      | 1150                                  | 175 (15.22)          | 363                                                                 | 110 (30.30)          | 2.31 (1.73, 3.07)       | .60                              |
| 65-75                      | 170                                   | 22 (12.94)           | 75                                                                  | 23 (30.67)           | 2.88 (1.46, 5.69)       |                                  |
| Gender                     |                                       |                      |                                                                     |                      |                         |                                  |
| Female                     | 676                                   | 102 (15.09)          | 235                                                                 | 73 (31.06)           | 2.37 (1.66, 3.39)       | .97                              |
| Male                       | 644                                   | 95 (14.75)           | 203                                                                 | 60 (29.56)           | 2.35 (1.60, 3.45)       |                                  |
| Ethnicity                  |                                       |                      |                                                                     |                      |                         |                                  |
| Hispanic or Latino         | 1055                                  | 158 (14.98)          | 349                                                                 | 109 (31.23)          | 2.52 (1.87, 3.38)       | .65                              |
| Not Hispanic or Latino     | 240                                   | 36 (15.00)           | 80                                                                  | 24 (30.00)           | 2.16 (1.18, 3.96)       |                                  |
| Unknown                    | 25                                    | 3 (12.00)            | 9                                                                   | 0 (0.00)             |                         |                                  |
| Language                   |                                       |                      |                                                                     |                      |                         |                                  |
| English                    | 549                                   | 63 (11.48)           | 170                                                                 | 39 (22.94)           | 2.44 (1.75, 3.41)       | .75                              |
| Spanish                    | 733                                   | 125 (17.05)          | 255                                                                 | 89 (34.90)           | 2.23 (1.42, 3.50)       |                                  |
| Other                      | 32                                    | 9 (28.13)            | 12                                                                  | 5 (41.67)            |                         |                                  |
| Federal Poverty Level      |                                       |                      |                                                                     |                      |                         |                                  |
| < 100%                     | 1085                                  | 162 (14.93)          | 357                                                                 | 107 (29.97)          | 2.98 (1.72, 3.08)       | .78                              |
| 100% - 200%                | 175                                   | 27 (15.43)           | 62                                                                  | 20 (32.25)           | 2.56 (1.29, 5.06)       |                                  |
| >200%                      | 54                                    | 7 (12.96)            | 17                                                                  | 6 (35.29)            | 3.59 (0.99, 12.99)      |                                  |
| Insurance status           |                                       |                      |                                                                     |                      |                         |                                  |
| Uninsured                  | 221                                   | 33 (14.93)           | 29                                                                  | 7 (24.14)            | 1.71 (0.66, 4.41)       | .53                              |
| Medicaid                   | 669                                   | 94 (14.05)           | 247                                                                 | 66 (26.72)           | 2.13 (1.49, 3.07)       |                                  |
| Medicare                   | 106                                   | 14 (13.21)           | 39                                                                  | 9 (23.08)            | 2.01 (0.77, 5.21)       |                                  |
| Commercial                 | 324                                   | 56 (17.28)           | 123                                                                 | 51 (41.46)           | 3.12 (1.94, 5.02)       |                                  |
| Clinic visits in past year |                                       |                      |                                                                     |                      |                         |                                  |
| None                       | 541                                   | 58 (10.72)           | 135                                                                 | 28 (20.74)           | 2.12 (1.27, 3.53)       | .74                              |
| 1 or more                  | 779                                   | 139 (17.84)          | 303                                                                 | 105 (34.65)          | 2.34 (1.72, 3.19)       |                                  |

<sup>a</sup>P value based on Wald chi-squared test.
